# Supplementary material for: Elucidating Cancer Subtypes by Using the Relationship between DNA Methylation and Gene Expression
Source: MDPI journal article supplement (doi:10.3390/genes15050631), 2024-05-16
Supplement: s1 [file s1]

# Elucidating Subtypes by using the Relationship between DNA Methylation and Gene Expression in Cancer – Supplementary Material

Table S1: Datasets used in this study: Gene expression and DNA methylation datasets corresponding to Glioblastoma Multiforme (GBM), lung squamous cell carcinoma (LSCC) and colon adenocarcinoma (COAD) cancers

| Data | Samples | Expression Dimensionality | Methylation Dimensionality |
|------|---------|---------------------------|----------------------------|
| GBM  | 211     | 12042                     | 13050                      |
| LSCC | 106     | 12042                     | 23074                      |
| COAD | 92      | 17814                     | 23088                      |

Table S2: Sizes of clusters for Glioblastoma Multiforme (GBM), lung squamous cell carcinoma (LSCC) and colon adenocarcinoma (COAD) cancers

| Data | Clusters       |
|------|----------------|
| GBM  | 150, 44, 17    |
| LSCC | 38, 32, 24, 12 |
| COAD | 45, 26, 21     |

Table S3: Genes selected by sCCA for Glioblastoma Multiforme (GBM), lung squamous cell carcinoma (LSCC) and colon adenocarcinoma (COAD) cancers

| Data | Genes                                                                                                                                                                                                                                                                                                                                                                                                                                                                                                                                                         |
|------|---------------------------------------------------------------------------------------------------------------------------------------------------------------------------------------------------------------------------------------------------------------------------------------------------------------------------------------------------------------------------------------------------------------------------------------------------------------------------------------------------------------------------------------------------------------|
| GBM  | <i>HOXA6, HOXA5, SOX10, TEX11, TLR5, HOXA7, SERTAD3, TIMP1, DYNLT3, ST7L, HOXD3, HOXA4, CASP8, LGALS3, FLJ13611, EMP3, NME6, CBLN1, HOXC10, HRASLS, MYO1F, CSF1R, GAL3ST1, TUBB2A, IL10RA, DNAJC17, DRD4, KCNS3, C1orf165, WAS</i>                                                                                                                                                                                                                                                                                                                            |
| LSCC | <i>PCGF1, BANF1, FGF22, BAT1, GPR32, PRKCSH, SBNO2, FKBP8, HIRA, NACAP1, GTF2H4, KLHL1, LOC90379, E2F4, PFDN6, SCYL2, WDR57, ATN1, FLJ21075, CD3E, CASP2, GNL3L, AIP, C20orf10, OTOF, ZNF747, TRIP10, TBL1XR1, ADAM30, PPP3R1, AQP7, PPIL2, MYBBP1A, EMD, RRP12, SEMA6A, TM4SF20, GMEB1, ACTR8, DLST</i>                                                                                                                                                                                                                                                      |
| COAD | <i>FOXG1, XKR6, UBE2G1, ZNF141, EPM2AIP1, FSCN1, RAB5C, EGFL7, MGC42090, TRIM7, NXF3, SEMG1, MR-FAP1L1, RAB32, C9orf58, PLP1, C7orf47, MTERF, LCE2C, RSPO3, WDR82, GPR143, NUTF2, CNO, GPR42, ZNF256, P2RY14, GJA3, TACR3, CPEB3, SERPINB10, C18orf8, NOTCH3, ANXA10, RNF19B, QPRT, VPRBP, PATE, EIF5A, CH25H, CLASP1, C10orf47, PPP6C, SALL3, RFX4, NUBP1, HOMER2, OR1L4, ANKRD5, PRPSAP2, SPEG, DNALI1, GPR126, FAM69B, ZIC5, AMFR, FBF1, SPATS2, C6orf97, TUBG1, NDNL2, MLH1, CX3CL1, HOXB8, ZNF304, N4BP1, DCTN2, IL9, KHDRBS3, SH3GL1, OR8B12, GPR34</i> |

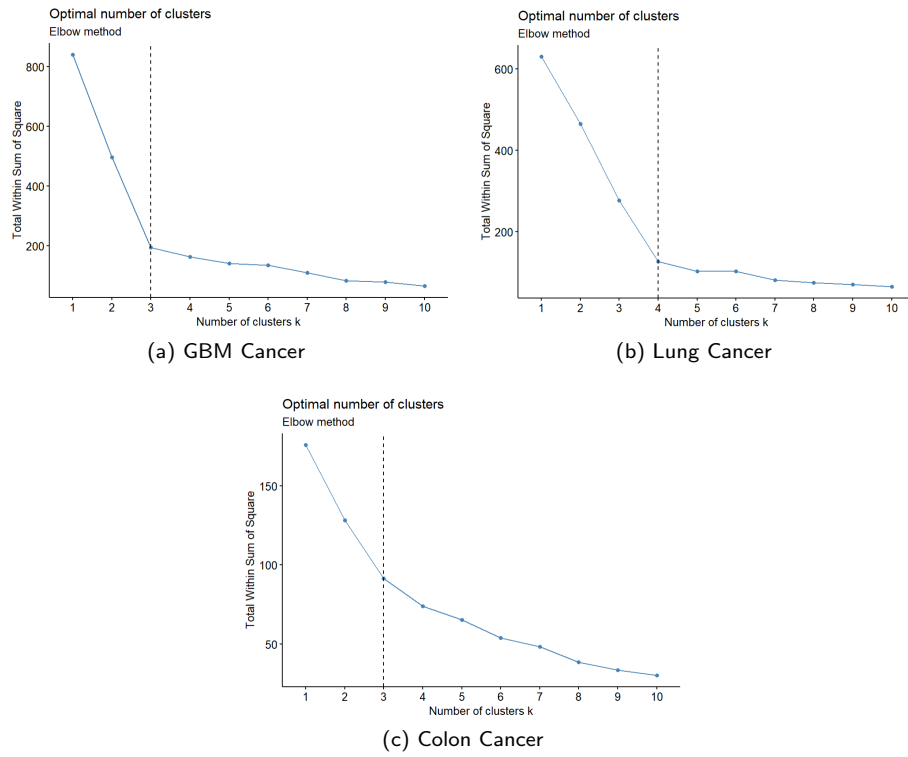

Figure S1: Elbow plots for (a) Glioblastoma Multiforme (GBM), (b) lung squamous cell carcinoma (LSCC) and (c) colon adenocarcinoma (COAD) cancers
